1 **Title: Relationship Between Inter-individual Variation in Circadian Rhythm and Sociality: A case Study Using**  
2 **Halictid Bees**

3 **Author information: Sofía Meléndez Cartagena<sup>1</sup>, Carlos A. Ortiz-Alvarado<sup>1</sup>, Patricia Ordoñez<sup>2</sup>, Claudia S.**  
4 **Cordero-Martínez<sup>1</sup>, Alexandria F. Ambrose<sup>3</sup>, Luis A Roman Lizasoain<sup>1</sup>, Milexis A Santos Vega<sup>1</sup>, Andrea V**  
5 **Velez Velez<sup>1</sup>, Jenny P. Acevedo-Gonzalez<sup>1</sup>, Jason Gibbs<sup>4</sup>, Theodora Petanidou<sup>5</sup>, Thomas Tscheulin<sup>5</sup>, John T.**  
6 **Barthell<sup>6</sup>, Victor H. González<sup>7</sup>, Tugrul Giray<sup>1</sup>, José L. Agosto-Rivera<sup>1</sup>**

7 1. Department of Biology, University of Puerto Rico Rio Piedras, San Juan, PR

8 2. Department of Computer Science, University of Puerto Rico Rio Piedras, San Juan, PR

9 3. Department of marine and coastal biology, Rutgers University, New Brunswick, NJ

10 4. Department of Entomology, University of Manitoba, Manitoba, CAN

11 5. Department of Geography, University of the Aegean, Mytilene, GR

12 6. Department of Biology, University of Central Oklahoma, Oklahoma, USA

13 7. Undergraduate Biology Program and Department of Ecology and Evolutionary Biology, University of Kansas,  
14 Kansas, USA

15 **Correspondence:**

16 Corresponding author: Sofía Meléndez Cartagena

17 Email: [sofia.melendez.cartagena@gmail.com](mailto:sofia.melendez.cartagena@gmail.com)

18 **Abstract:**

19 The bee family Halictidae is considered to be an optimal model for the study of social evolution due to its  
20 remarkable range of social behaviors. Past studies in circadian rhythms suggest that social species may express more  
21 diversity in circadian behaviors than solitary species. However, these previous studies did not make appropriate  
22 taxonomic comparisons. To further explore the link between circadian rhythms and sociality, we examine four  
23 halictid species with different degrees of sociality, three social species of *Lasioglossum*, one from Greece and two  
24 from Puerto Rico, and a solitary species of *Systropha* from Greece. Based on our previous observations, we  
25 hypothesized that species with greater degree of sociality will show greater inter-individual variation in circadian  
26 rhythms than solitary species. We observed distinct differences in their circadian behavior that parallel differences  
27 across sociality, where the most social species expressed the highest inter-individual variation. We predict that  
28 circadian rhythm differences will be informative of sociality across organisms.

29 **Keywords:** Circadian Rhythms, Halictidae, Sociality, Behavior

30 **Declarations:**

31 **Funding:** This work was supported by National Science Foundation Division of Biological Infrastructure, Research  
32 Experience for Undergraduate [1560389]; National Science Foundation, Program for International Research  
33 Experience [1545803]; National Science Foundation, Puerto Rico Center for Environmental Neuroscience  
34 [1736019]; National Science Foundation, Big-Data [1633164 and 1633184]; and the National Institute of Health,  
35 Research Initiative for Scientific Enhancement [5R25GM061151-18]. The research received additional support by  
36 THALES program (ESF, NSRF), project POL-AEGIS [MIS 376737].

37 **Acknowledgements:** Kristie Shirley, Sarah Markland, Jordan Twombly-Ellis, Elif Kardas, Jonathan A. Lopez Colon,  
38 Eddie Perez Claudio, Alejandro Armas, Melanie E. Martinez Arrocho, Luis A Roman Lizasoain, Elvia Meléndez-  
39 Ackerman, Genetics Laboratory at the University of Puerto Rico, BIOL 4999-423: Scientific Writing-Fall 2020

40 **Conflicts of interest/Competing interests:** The authors declare no conflicts of interest.

41 **Availability of data and material:** All data analyzed during this study is included in its supplementary information  
42 files.

43 **Authors' contributions:**

44 All authors contributed to the study conception and design. Material preparation, data collection and analysis were  
45 performed by Sofía Meléndez Cartagena, José L. Agosto-Rivera, Carlos A. Ortiz-Alvarado, Claudia S. Cordero-  
46 Martínez, Alexandria F. Ambrose, Luis A Roman Lizasoain, Milexis A Santos Vega, Andrea V Velez Velez. The  
47 first draft of the manuscript was written by Sofía Meléndez Cartagena and all authors commented on previous  
48 versions of the manuscript. All authors read and approved the final manuscript.

49 **Significance Statement:**

50 Circadian rhythms differ across solitary and social organisms. One important feature we discovered is that  
51 in highly eusocial insects there was a high level of individual variation in circadian activity. We took advantage of  
52 varying levels of sociality within halictids and examined the circadian rhythms of multiple members of the genus  
53 *Lasioglossum* and of a *Systhropha* species. This work is the first report to link interindividual variation in circadian

54 rhythms with the degree of sociality: interindividual variation increases with increased level of sociality. This study  
55 invites investigating the potential role of circadian rhythm variation in social organization.

## 56 **Introduction:**

57         Understanding the evolutionary link between solitary and eusocial lineages, and their adaptive behaviors,  
58 such as those expressed in reproduction and brood care, is a perennial question in insect evolutionary biology (Toth  
59 and Rehan 2017). Insects, and in particular hymenopterans, have been useful in observing how sociality is related to  
60 other types of behaviors, such as competitor effects (Peters et al. 2017). A potential behavior to be evaluated in  
61 relation to sociality is circadian rhythm, as it has been proposed to be governed by demands arising from sociality not  
62 only in insects but also in mammals (Mistlberger 2004; Giannoni-Guzman et al. 2014; Beer and Helfrich-Förster  
63 2020).

64         Circadian rhythms can be viewed as a biological clock that most living organisms possess. These biological  
65 clocks regulate processes such as gene expression, behavior, body temperature, and sleep-wake patterns. Biological  
66 clocks follow a rhythm that is approximately synchronized to Earth's 24-hour rotation using signals from the  
67 environment called "zeitgebers" or time givers. This process of synchronization needs active reestablishment, and it  
68 is called entrainment (Roenneberg et al. 2003).

69         Circadian rhythms have been studied in a wide range of organisms, from plants, invertebrates, birds to  
70 mammals (Helm and Visser 2010). The traditional model animal to study this phenomenon is the fruit fly, *Drosophila*  
71 *melanogaster*, where biological clocks are described at the molecular level (Dubowy and Sehgal 2017). Although this  
72 model has been pivotal to the understanding of circadian rhythms, the lack of genetic diversity in the fruit fly reduces  
73 the relevance of the model because it limits questions regarding individual differences in rhythms.

74         Past studies, such as those of Bloch et al. (2001) and Moore et al. (1998), revealed that the rhythmicity of  
75 honey bees changed with age. Additionally, Giannoni-Guzman et al. (2020) showed that foragers in the wild display  
76 discrete categories that suggest temporal shift work. An earlier study from Giannoni-Guzman and colleagues (2014)  
77 compared the endogenous period of three different variants of honey bees (*Apis mellifera carnica*, *Apis mellifera*  
78 *caucasica* and *Apis mellifera gAHB*) as well as similarly sized insects from different orders and families. They found  
79 that honey bees and paper wasps (*Polistes crinitus* and *Mischocyttarus phthisicus*) had a larger degree of circadian  
80 period variation within the population in comparison to *D. melanogaster*. The authors mentioned several possible  
81 explanations for their observations, one of them being demands of sociality. In a more recent study by Beer and

82 Helfrich-Förster (2020), they explore this connection further and note that the development of the circadian circuitry  
83 varies between a eusocial (*Apis mellifera*) and a solitary species (*Osmia bicornis*). In particular, they observe that  
84 eusocial individuals do not display circadian locomotion at adult emergence, while the solitary individuals emerge  
85 displaying a fully rhythmic circadian rhythm; These differences are attributed to their opposite levels of sociality.  
86 However, because these two past studies were done with species spanning from different taxonomic groups, it would  
87 be difficult to support their claims without taking phylogeny into account. Nevertheless, these works do give a basis  
88 to ask how circadian rhythms vary and are an integral part of the survival strategy and organization of these animals.  
89 Moreover, it makes us consider that the level of sociality in different organisms may play a role in their daily activity  
90 patterns. An important emerging feature is that in social insects, be it groups of individuals as defined by their age and  
91 job (Moore et al. 1998, Bloch et al. 2001), or individuals in the same age and task group (Giannoni-Guzman et al.  
92 2014, 2020), exhibit differences in their circadian rhythms with functional significance for their sociality. We  
93 hypothesize that with increasing levels of social organization, as can be measured in size of the social group, greater  
94 levels of individual variation in circadian rhythms will be observed.

95 We tested this hypothesis of socially increased individual variation, by examining circadian rhythms of  
96 foragers from differently social halictid bees. Halictidae (Hymenoptera) is a bee family considered to be a great model  
97 for the study of social evolution due to its exceptional diversity in respect to social behavior within and among species  
98 and populations (Schwarz et al. 2007). *Lasioglossum* Curtis is one of the two genera in the tribe Halictini that displays  
99 eusocial behavior, but also includes solitary representatives and a range of intermediate social categories (Danforth et  
100 al. 2003; Gibbs et al. 2012). Additionally, past studies have shown plasticity in the social behavior even among  
101 populations of the same species (Eickwort et al. 1996; Field 1996; Field et al. 2010; Richards et al. 2003; Soucy and  
102 Danforth 2002; Richards 2000). Depending on environmental conditions, such as elevation, latitude and seasonality,  
103 halictid bees might display different modes of sociality. Species with social nests may revert to solitary behavior at  
104 high latitudes and altitudes (Eickwort et al. 1996; Packer et al. 1983; Field et al. 2010) or based on access to mates  
105 (Yanega 1988/1989). Jeanson et al. (2008) studied members of a solitary species, *Lasioglossum* (*Ctenonomia*) sp.  
106 NDA-1 and observed the results of having them nest in pairs. They finally observed that after some time together, the  
107 individuals in the nest started to show signs of division of labor. This plasticity and diversity of behavior in addition  
108 to the close taxonomic relation, makes Halictidae an optimal model for observing the relationship between sociality  
109 and circadian rhythm (Bloch and Grozinger 2011).

110 To better understand association of sociality with individual variation in circadian rhythms, we have set out  
111 to document the rhythm in four species of halictid bees that span a gradient of social complexity. *Systropha curvicornis*  
112 (Scopoli) (Halictidae: Rophitinae), a solitary pollinator specialist (Grozđanić and Mučalica 1966) considered  
113 ancestrally solitary within the family Halictidae (Patiny and Michez 2007; Patiny et al. 2008; Danforth et al. 2008),  
114 and three species of *Lasioglossum* (*L. ferreri*, *L. enatum* and *L. malachurum*), which were selected because of their  
115 varying levels of social behavior (Eickwort 1988; Wyman and Richards 2003; Gibbs 2018). Species of *Lasioglossum*  
116 likely had a common ancestor capable of eusocial nesting but have reverted multiple times to other levels of sociality  
117 (Danforth et al. 2003; Brady et al. 2006; Gibbs et al. 2012). *Lasioglossum (Dialictus) ferrerii* (Baker) and *L. (Dialictus)*  
118 *enatum* (Gibbs) occurs in the Caribbean whereas *L. malachurum* across Europe; the first species nests communally,  
119 that is each individual contributes to nest construction and reproduction (Michener 1974; Eickwort 1988). Although  
120 *L. enatum* has not been thoroughly studied, this species is part of a species complex that includes weakly eusocial  
121 species. Namely, *L. gemmatum* (Smith) and *L. parvum* (Cresson) from Jamaica and the Bahamas, which exhibit  
122 reproductive division of labour (Eickwort 1988). There is no evidence of morphologically defined castes beyond  
123 reproductive status in these two species and thus we assumed this is likely the case for *L. enatum* in Puerto Rico,  
124 where we conducted our experiments. In contrast, *L. malachurum* (Kirby) is an obligately eusocial species with  
125 morphologically well-defined queen and worker castes (Richards 2000; Wyman and Richards 2003). *Lasioglossum*  
126 *malachurum* is known to display varying degrees of behaviors depending on location (Richards 2000). In Lesbos,  
127 Greece, where we studied this species, they were observed to exhibit a facultatively eusocial behavior (Wyman and  
128 Richards 2003). In summary, the level of sociality in the four species goes from lowest to highest: solitary *Systropha*  
129 *curvicornis*, communal *Lasioglossum ferreri*, weakly eusocial *Lasioglossum enatum*, and the eusocial *Lasioglossum*  
130 *malachurum*. The socially increased individual variation hypothesis predicts individual variation of foragers from  
131 each species to increase from solitary to eusocial. Alternatively, individual variation could be the result of ecological  
132 differences such as differences in robustness of time givers in different environments. Two of the halictids examined  
133 here are from a tropical zone (a communal and an eusocial) and two are from a temperate zone (a solitary and an  
134 eusocial).

135 The social plasticity of *Lasioglossum* and its potential as a model for social evolution leads us to believe that  
136 observing this group of bees can give invaluable insight on how social behavior affects biological clocks. To test if

137 sociality increases individual variation, we captured the forager bees as they were visiting flowers and observed their  
138 circadian variability in the laboratory using constant conditions.

## 139 **Methods and Materials:**

### 140 *Study sites*

#### 141 *Puerto Rico:*

142 *Lasioglossum ferrerii* and *L. enatum* were captured using 15 mL falcon tubes from flowers at the Balneario  
143 de Luquillo parking lot (18.38706 N 65.72517W, 3 Meters) in Puerto Rico. This site is characterized by having many  
144 vine-type plants, high vegetation density, and it is located right next to a road with *Momordica charantia* being the  
145 most abundant (Figure 1.A and 1.B). Most bees were caught between 8:00 and 12:00 h at the flowers of *Momordica*  
146 *charantia* L. (Cucurbitaceae), *Sida acuta* Burm.fil. (Malvaceae), and *Bidens alba* (L.) DC. (Asteraceae). We also  
147 observed them visiting *Euphorbia heterophylla* which has not been reported in previous literature. Collections took  
148 place during the months of December, January, March, and August. In total we collected 36 bees, 26 of which were  
149 *L. ferrerii* and 10 were *L. enatum*.

#### 150 *Greece:*

151 *Systropha curvicornis* and *L. malachurum* bees were collected between 6:00 and 9:00 h from flowers of  
152 *Convolvulus arvensis* (Convolvulaceae) that were growing on a recently cut wheat field in Skala Kallonis (39° 10'N  
153 26° 20'E, 0 Meters) on the Island of Lesbos, Greece. We used 15 mL falcon tubes to catch bees in the field, which  
154 would house the individual for the duration of the experiment. Sampling was conducted on July 3 of 2017. From this  
155 sampling 118 bees were *L. malachurum* and 34 were *S. curvicornis*.

### 156 *Laboratory settings*

157 After collection in the falcon tubes, bees were provided with food that lasted for the whole of the observation  
158 period. The food recipe we used varied between the studies in Puerto Rico and Greece (As explained below). The  
159 main nutrient for both recipes was sugar and therefore are nutritionally comparable. However the agarose based recipe  
160 (Puerto Rico) was more convenient in terms of ease and speed of preparation due to the fact that an independant water  
161 system was not necessary.

162 Food preparation varied by locations as follows: In Puerto Rico, for every 0.89 ml of water, 1 g of sucrose  
163 and 0.1 g of agarose were used. The water was heated in a stirring plate with a magnetic stirrer placed at the bottom.  
164 We added the sucrose first to the solution, and when it was dissolved, the agarose was incorporated. The solution was

165 left stirring until it turned into a lighter color while mindful of not letting the solution heat too much, or part of the  
166 volume would be lost. As a form of assurance, we made 3 ml more than what was expected to be used. After all solids  
167 were diluted, we quickly pipetted 1 ml into the bottom of a 15 ml centrifuge tube, being mindful of not letting it splash.  
168 Once all of the tubes had their portion of the solution, they were allowed to reach room temperature and finally they  
169 were refrigerated. The final product was a gel that could be kept refrigerated until the day it needed to be used as long  
170 as it did not dehydrate.

171 In Greece, captured *S. curvicornis* and *L. malachurum* were fed with ApiYem (Namik Kemal University with  
172 Kosgeb R&D Innovation Project) which is a commercial bee feed composed of 78.5% sugar and 21.5% invert syrup.  
173 Food was placed in the cap-end of each tube and a damp cotton was placed in the other end of the tube to provide  
174 water to the bees. The water supply was refilled every 2–3 days. Resources were provided ad libitum during the  
175 complete running period of the experiment.

#### 176 *Locomotor activity monitoring*

177 Each bee was monitored individually for at least seven days in the falcon tube in which they were captured.  
178 The tubes were plugged using cotton balls to let air circulate. These tubes were then placed into TriKinetics'  
179 Locomotion Activity monitors (LAM16) that, in turn, were put inside incubators that were set to constant conditions.  
180 In Greece the temperature was 26 , humidity 78%, constant darkness. In Puerto Rico the temperature was 30, humidity  
181 65%, constant darkness. The differences in the environmental chamber conditions were set to resemble the average  
182 daytime parameters at each location.

#### 183 *Species Identification*

184 The individuals caught in Puerto Rico were identified using Gibbs (2018). Samples collected in Greece were  
185 identified by an in-field expert, Victor H. Gonzalez (University of Kansas).

#### 186 **Data processing and analysis**

##### 187 *Circadian Analysis*

188 Circadian rhythm and locomotor activity for our subjects were analyzed using the MATLAB toolboxes  
189 developed in Jeffrey Hall's laboratory (Levine et al. 2002). The outputs provided data on the individual's locomotor  
190 activity throughout the experiment in the form of an actogram, average activity plot, and an autocorrelation that also  
191 calculates rhythm strength.

192 To test if the observed differences in circadian patterns across species were statistically significant, we  
193 applied a Brown-Forsythe one way ANOVA with a Dunnett's T3 multiple comparisons test using GraphPad Prism  
194 version 8.4.3 for Windows, GraphPad Software, San Diego, California, USA, [www.graphpad.com](http://www.graphpad.com). The variables  
195 taken into consideration for this was time, species, individuals, and interspecies variation.

196 **Results:**

197 During the Summer of 2017 on the 3<sup>rd</sup> of July between the hours of 6:00 am and 9:00 am, *S. curvicornis*  
198 and *L. malachurum* were caught as they visited the flowers of *Convolvulus arvensis* on the island of Lesbos. They  
199 were transported from the field to the laboratory and placed inside an incubator for 10 days of which 8 were in  
200 constant conditions (26 °C and 57 % humidity) with the purpose of characterizing their intrinsic biological  
201 clock. During this collection 118 bees were *L. malachurum* although only 98 survived until the end and 34 were *S.*  
202 *curvicornis* of which only 4 females survived the study period.

203 Figure 2.A illustrates the average of individuals evaluated under constant conditions of the Greek, solitary  
204 and specialist pollinator *S. curvicornis*. Its period runs slightly short at approximately 22 hours, with the peak of its  
205 activity in the early morning and an average rhythm strength of 4.4. The population average is consistent with the  
206 individuals examined, as illustrated in Figure 2.B; a randomly selected individual looks fairly similar to the activity  
207 plotted for the population average. The average for period was 22.75 with a standard deviation of 0.41, Rhythm  
208 Strength had an average of 4 and standard deviation of 0.707.

209 The consistency displayed by our population of female *S. curvicornis* is contrasted with the diversity  
210 observed in the other 3 species analyzed in this study. This is especially true for the eusocial *L. malachurum*, for  
211 whom after careful evaluation of the data we had to create a classification schematic (Figure 3) to appropriately  
212 describe the phenotypes being displayed by the population. The population average shows that *L. malachurum*, as a  
213 species, has a perfectly circadian 24-hour period under constant dark conditions. Peak average activity of *L.*  
214 *malachurum* is at 6:00 h, with no clear rest periods when all individuals are averaged. When examined individually,  
215 we found five distinct patterns of circadian activity patterns (Figure 3.A and Figure 4). These patterns can be divided  
216 into 2 large branches (Figure 3.A), those that are rhythmic and those that are arrhythmic i.e, individuals with uniform  
217 distribution of activity. Rhythmic individuals varied in the amplitude of their activity rhythm and therefore were  
218 classified as strong or weakly rhythmic. Moreover, both strong and weak categories are subdivided into unimodal or



219 bimodal based on the number of activity peaks per day. For example, a bimodal individual is active during two  
220 different instances of the day like the morning and the afternoon (Figures 4.B and 4.C), while a unimodal individual  
221 is mostly active during a set time of the day (Figures 4.D and 4.E).

222 Strongly rhythmic individuals (either unimodal or bimodal) constituted 41% of individuals. These patterns  
223 are recognized by a strong Rhythm Strength (RS)(Figures 4.B.iii and 4.D.iii) on average higher than 2.67 and clear  
224 rest and active periods both in the double plotted actogram (Figures 4.B.i and 4.D.i) and the average activity  
225 plot(Figures 4.B.ii and 4.D.ii). Weak rhythmicity (Figure 4.C and 4.E) was observed in 21.6% of individuals and  
226 they were characterized by having RS values (Figure 4.C.iii and 4.E.iii) that average on 1.79, but their actograms  
227 (Figure 4.C.i and 4.E.i) do not show a clear pattern of locomotor activity. Finally, 38% of individuals were  
228 arrhythmic. Both the double plotted actogram (Figure 4.F.i) and the average activity plot (Figure 4.F.ii)for  
229 arrhythmic bees do not have any discernible daily pattern of activity or inactivity. Often the autocorrelation (Figure  
230 4.F.iii) does not return any values.

231 On February 19, 2020, between 8:00 am and 10:00 am, at the Balneario de Luquillo (Figure 1.A and B), 36  
232 bees were captured as they visited *Bidens alba*, *Momordica charantia* and *Sida acuta*. Bees were captured and  
233 monitored individually in one tube each (modified from Giannoni-Guzman et al. 2014). In the laboratory, the bees  
234 were placed inside an incubator for seven days in constant conditions so we could characterize their intrinsic  
235 biological clock.

236 Of the 36 bees captured, 26 were identified as *Lasioglossum ferrerii* (Figure 1.C and 1.D) and ten as  
237 *Lasioglossum enatum* (Figure 1.E and 1.F). Only 22 *L. ferrerii* and 8 *L. enatum*, survived the entire observation  
238 period and were used for analysis. The average peak of circadian activity for *L. ferrerii* is between 6:00–7:00  
239 (Figure 5.A.ii) with a 23 hour period (Figure 5.A. iii), making it short. Individuals fell into two categories, 50% were  
240 strongly rhythmic and 50% were weakly rhythmic (Figures. 5B and 5C). The peak of average activity for *L. enatum*  
241 is from the fifth to the seventh hours of the day, with a circadian period of 23.8 hours (Figure 6.Aiii), just slightly  
242 short of a day. The average peak of activity for *L. enatum* was 6:00-7:00 (Figure 6.A.ii). *L. enatum* also had three  
243 patterns of activity with similar characteristics to that of the umbrella categories for *L. malachurum*, and we saw it  
244 fit to categorize them in a similar fashion (Figure 6). 12.5% of the observed population fell into the strongly  
245 rhythmic category, 25% in the weak rhythmic category and 62.5% in the arrhythmic category.

246 In summary, all four of the described species followed unique patterns of behavior (Figure 7.A)  
247 characterized by the amount of interindividual variation. *Systropha curvicornis* was the species with the least  
248 amount of observed interindividual variation in its daily activity patterns, followed by *L. ferrerii* with two distinct  
249 patterns of behavior, then *L. enatum* with 3 and lastly *L. malachurum* with 5.

#### 250 *Cross species comparison of observed circadian parameters*

251 Average activity was only significant between *L. ferrerii* and *L. malachurum* with a p-value of 0.0016  
252 (Figure 7.B). Circadian Period (Figure 7.C) on the other hand showed differences between *S. curvicornis* and *L.*  
253 *ferrerii* with a p-value of 0.0102 as well as *L. malachurum* and *L. ferrerii* with a p-value of <0.0001. Lastly, with  
254 even more differences still, Rhythm Strength (Figure 7.D) presented differences between *S. curvicornis* and *L.*  
255 *enatum* (p-value = 0.0014), *S. curvicornis* and *L. malachurum* (p-value = 0.0177), *L. ferrerii* and *L. enatum* (p-value  
256 = 0.0056) and finally, *L. ferrerii* and *L. malachurum* (p-value = 0.0259).

#### 257 **Discussion:**

258 This study lays the groundwork for the use of halictid bees for cross species comparisons of circadian  
259 rhythms. Consistent with our hypothesis, we found that greater degrees of sociality are associated with larger  
260 individual differences of circadian rhythms within a population.

261 The solitary specialist, *S. curvicornis* as observed in this work, suggests that at least for the females, the  
262 population is consistent, displaying a single circadian activity phenotype (Figure 7.A). Activity of these bees is  
263 highly rhythmic and shows little variation across samples with an average RS of 4.4 and the peak of activity appears  
264 to be near the hour 6 of the day. Overall, the species exhibits a short period phenotype under constant darkness. This  
265 high degree of rhythmicity might be due to *S. curvicornis*' evolutionary history as a foraging specialist of *C.*  
266 *arvensis*, which blooms for a brief period during the morning, a pattern described for another closely related species  
267 (*S. planidens*: Gonzalez et al. 2014). A rigorous internal clock is important to be able to anticipate the time when  
268 resources are available. For example, the immediate development of *Osmia bicornis*' circadian rhythm (Beer and  
269 Helfrich-Förster 2020) may be related to nourishment accessibility, as it has been shown in the past that large  
270 quantities of pollen are the key to proper larvae development rather than diversity of pollen (Radmacher and Strohm  
271 2010). All three of these species (*S. curvicornis*, *S. planidens* and *O. bicornis*) lead solitary lifestyles and

272 consequently must assure the survival of their progeny in an individual manner. A strong circadian rhythm can  
273 ensure that a female may find sufficient resources efficiently to feed its young.

274 All three species of *Lasioglossum* examined were shown to have more than one distinct pattern of circadian  
275 activity. The most diverse of the three was the facultatively eusocial *L. malachurum* (Figure 7.A) with 5 distinct  
276 circadian behaviors. Two of the sub-categories of these behaviors fall under the strongly rhythmic category, which  
277 we are calling binomial and unimodal. These rhythmic categories are characterized for having an easy to distinguish  
278 pattern in the actogram, clear rest/activity periods in the average activity plot, and an RS higher than one. Another  
279 two of the sub-categories fall under the weakly rhythmic umbrella. This umbrella, just like the strongly rhythmic  
280 category, can be divided into bimodal and unimodal. These categories can be identified by an actogram with no  
281 clear pattern, an average activity plot with more or less clear rest/activity pattern, and an RS larger than one. Lastly,  
282 there is the arrhythmic category where no discernible pattern can be pinpointed in the actogram nor in the average  
283 activity plot and its RS is less than one. A conceptual map on how these categories are identified can be found in  
284 Figure 3.A.

285 To make descriptions comparable across species, we used the same metrics to categorize the other two bees  
286 examined in this study. In categorizing *L. ferrerii* and *L. enatum*, our categories worked as a good basis. *L. ferrerii*  
287 only had two distinguishable patterns: rhythmic and noisy rhythmic (Figure 7.A). We decided to change the name  
288 from weakly rhythmic to noisy rhythmic because it is a better descriptor (Figure 3.B). Similarly, *L. enatum*, which  
289 lives in the same environment as *L. ferrerii*, has 3 distinguishable categories (Figure 7.A). These categories are  
290 rhythmic, noisy, rhythmic and arrhythmic. Contrary to *L. ferrerii*, *L. enatum* expressed 5 individuals in the  
291 arrhythmic category. Taking into consideration that both of these species of bees were caught in the same  
292 environment, and they belong to the same genus, the results suggest that something other than environmental  
293 variables are behind these differences.

294 The difference in expression of circadian patterns between *L. ferrerii* and *L. enatum* could be explained by  
295 competition. Both of these species share the same niche in Luquillo, to the point of them being caught in the same  
296 flowers during the same range of time. Having a slight difference in rhythmicity can lower the possibility of  
297 temporal competition when foraging. *L. ferrerii* on average would be active from 5:00 am to 10:00 am, while  
298 average time of activity for *L. enatum* would be from 3:00 am to 8:00 am. Due to that two-hour disphase, it would

299 appear to be less likely that bees from these two species try to visit a flower simultaneously, yet their schedules still  
300 have some overlap. These observations are echoed by another study conducted in Greece where they demonstrated  
301 that 3 species of carpenter bees (*Xylocopa* spp.) that share the same resources have different circadian rhythms when  
302 measured under natural field conditions and also in artificial constant and oscillating conditions (Ortiz-Alvarado et  
303 al. *in rev.*). While the solitary *Xylocopa* species have interspecies variation in their circadian rhythms, two out of the  
304 3 examined in Ortiz-Alvarado et al. follow a similar pattern as *S. curvicornis*, were there isn't much if any individual  
305 differences in the populations examined. Therefore in that particular case, competitor effects can explain the  
306 differences in rhythm across species, but in the case of *L. ferrerii* and *L. enatum* it cannot explain the individual  
307 differences observed at the species level.

308         At a higher level looking at the statistical analysis of all 4 halictid bees (Figure 7), some interesting patterns  
309 can be noted. In terms of average activity (Figure 7.B), there was only a difference between *L. ferrerii* and *L.*  
310 *malachurum*, none of the other possible combinations of differences occurred. However, the length of the whiskers  
311 in the box plots for both *L. enatum* and *L. malachurum* does suggest a level of diversity at the intraspecies level and  
312 could be reflective of the number of circadian behaviors observed in these species.

313         When analyzing the circadian period, the observed differences were between *L. ferrerii* and *L. malachurum*  
314 as well as *S. curvicornis* and *L. malachurum* (Figure 7.C). The latter of these pairs have shared environmental  
315 conditions when the former pair does not. It is also interesting to note that *L. ferrerii* and *S. curvicornis* cannot be  
316 found in the same locations, and yet they do not appear to have significantly different circadian periods, in fact for  
317 the populations examined, they appear to be comparable.

318         The connection between individual differences in circadian rhythm and sociality becomes clearer still when  
319 observing rhythm strength (Figure 7.D). Where those species with a lesser number of circadian phenotypes are more  
320 similar to each other and likewise the ones with the most diversity are more similar to each other. In other words, *S.*  
321 *curvicornis* and *L. ferrerii* were both significantly different to *L. enatum* and *L. malachurum*, but not to each other.  
322 Likewise, there was no significant difference between *L. enatum* and *L. malachurum*. Because there is this  
323 consistency of differences that is not associated with differences in environments, we believe that the key to  
324 explaining the difference in diversity of behaviors may not lay in competition, but in something more endogenous of  
325 the species. Nevertheless, more data is needed.

326 *Lasioglossum* as a genus is well-known for having a large diversity in social behaviors. This diversity in  
327 sociality may also be reflected in other types of behaviors and could be the key to explaining the individual  
328 differences in circadian rhythm we observed across foragers within the species. One caveat for the present work is  
329 the sample size and populations evaluated (one population for each species and low number of individuals,  
330 particularly for *L. enatum*). One future direction is to identify additional populations of the same 4 species to  
331 examine consistency of the presented findings. In future studies we will focus on streamlining the process of  
332 describing the diverse circadian behaviors observed in a species to facilitate studies with a higher volume of  
333 observations. Additionally, we will continue describing the circadian rhythm of additional species of *Lasioglossum*  
334 that present social behaviors not evaluated in this study. Understanding the functional relationship between sociality  
335 and rhythm will add to further understanding of mechanisms underlying social organization.

336 **Figure Legends:**

337 **Figure 1: Habitat (A-B) and Species Observed (C-F).** **A)** Puerto Rico study site in which *L. ferrerii* and *L.*  
338 *enatum* were captured. **B)** Some of the vegetation the bees were observed visiting, with flowers belonging to the  
339 families: Commelinaceae, Cucurbitaceae and Euphorbiaceae. **C)** Female of *L. ferrerii* distinguished from the male  
340 by its short antenna and pointed abdomen. **D)** Male of *L. ferrerii*, distinguished by its long antennae and flat  
341 abdomen. This species is known for its long head shape and metallic metasoma (Gibbs 2018). **E)** Female of *L.*  
342 *enatum* distinguished from the male by its short antenna and pointed abdomen. **F)** Male of *L. enatum*, distinguished  
343 by its long antennae and flat abdomen. This species is distinguished by: “tegula punctate, extended posteriorly to  
344 form a small angle, mesepisternum punctate and metasoma brown” (Gibbs 2018).

345 **Figure 2: Female *S. curvicornis* exhibit short period phenotype under constant darkness (<24 h endogenous**  
346 **circadian rhythm).** (i) Double-plotted actogram showing the locomotor activity pattern of: (A) The average of all 4  
347 individuals examined of *S. curvicornis*. (B) A representative individual randomly selected from the population. In a  
348 double plotted actogram, each row represents locomotor activity (counts per 30 min) of two consecutive days and  
349 the second is repeated such that it is always the beginning of the next row. The x-axis shows the time of day under  
350 constant darkness expressed as circadian time (CT). (ii) Average of the locomotor activity patterns of the five days  
351 observed into one. The y-axis represents activity over time and the x-axis represents CT (iii) Autocorrelation plots  
352 used to determine the period (p), rhythm index (RI) and rhythm strength (RS). The oscillations indicate periodicity.

353 The asterisk at the third peak of the autocorrelation plot indicates the particular time point used for the determination  
354 of the rhythm parameters.

355 **Figure 3: A summary of the variations in the circadian rhythm as observed in: A) *Lasioglossum malachurum*,**  
356 **B) *Lasioglossum enatum* and *Lasioglossum ferreirii*.** The circle represents the root of the flowchart, squares  
357 represent nodes that branch off and rhombuses represent leaves. In total for malachurum, 5 distinct behaviors were  
358 observed.

359 **Figure 4: *L. malachurum* exhibits a variety of circadian phenotypes under constant dark conditions.** (i)  
360 Double-plotted actogram showing the locomotor activity pattern for 5 days of: (A) The average of all 98 individuals  
361 examined and representatives for the following categories: (B) Bimodal Rhythmic (C) Weakly Rhythmic Bimodal,  
362 (D) Unimodal Rhythmic, (E) Weakly Rhythmic Unimodal, (F) and Arrhythmic circadian behaviors. (ii) An average  
363 activity plot for the five days of observation (iii) Autocorrelation plots used to determine the period (p), rhythm  
364 index (RI) and rhythm strength (RS).

365 **Figure 5: Description of the circadian behaviors exhibited by *L. ferreirii* under constant dark conditions.** (i)  
366 Double-plotted actogram of the locomotor activity from the five-day observational period for: **A)** All 22 individuals  
367 from the data set averaged out into one representative individual. **B)** A representative individual out of the 11 from  
368 the category Strongly Rhythmic. **C)** A representative individual out of the 11 from the category Noisy Rhythmic.  
369 (ii) An average activity plot for the five days of observation (iii) Autocorrelation plots used to determine the period  
370 (p), rhythm index (RI) and rhythm strength (RS).

371 **Figure 6: Description of the circadian behaviors exhibited by *L. enatum* under constant dark conditions.** (i)  
372 Double-plotted actogram of the locomotor activity from the five-day observational period for: **A)** All 8 individuals  
373 from the data set averaged out into one representative individual. **B)** The only individual from the category Strongly  
374 Rhythmic. **C)** A representative individual out of the 2 from the category Noisy Rhythmic. **D)** A representative  
375 individual out of the 5 from the Arrhythmic category. (ii) An average activity plot for the five days of observation  
376 (iii) Autocorrelation plots used to determine the period (p), rhythm index (RI) and rhythm strength (RS).

377 **Figure 7: Summary of descriptive and inferential statistics.** **A)** Number of circadian categories observed by  
378 species. **B)** Box plot illustrating the difference in average locomotor activity between species. *S.*

379 *curvicornis* has a minimum of 8.200, 25% percentile of 8.900, mean of 13.63, 75% percentile of 20.28 and  
380 a maximum of 22.90. *L. ferrerii* has a minimum of 0.7000, 25% percentile of 2.675, mean of 4.950, 75%  
381 percentile of 7.100 and a maximum of 11.20. *L.enatum* has a minimum of 1.000, 25% percentile of 2.875,  
382 mean of 8.113, 75% percentile of 6.650 and a maximum of 36.00. *L. malachurum* has a minimum of 6.700,  
383 25% percentile of 10.35, mean of 8.201, 75% percentile of 10.35 and a maximum of 26.30. There was only  
384 a statistical difference between *L. ferrerii* and *L. malachurum* with a p-value of 0.0016, DF of 61.66 and t  
385 of 3.867. C) Box plot illustrating the difference in circadian period between species. *S.curvicornis* has a  
386 minimum of 22.20, 25% percentile of 22.35, mean of 22.75, 75% percentile of 23.10 and a maximum of  
387 23.20. *L. ferrerii* has a minimum of 21.80, 25% percentile of 21.95, mean of 22.69, 75% percentile of 23.20  
388 and a maximum of 24.200. *L.enatum* has a minimum of 20.00, 25% percentile of 22.40, mean of 23.31,  
389 75% percentile of 24.60 and a maximum of 25.50. *L. malachurum* has a minimum of 20.20, 25% percentile  
390 of 23.50, mean of 24.00, 75% percentile of 24.50 and a maximum of 27.80. Both *S. curvicornis* and *L.*  
391 *ferrerii* were significantly different from *L. malachurum* with p-values of; 0.0102 and <0.0001, DFs of;  
392 5.652 and 52.94 and, t of; 5.179 and 6.565, respectively. D) Box plot illustrating rhythm strength among  
393 species. *S. curvicornis* has a minimum of 3.000, 25% percentile of 3.250, mean of 4.000, 75% percentile of  
394 4.500 and a maximum of 4.500. *L. ferrerii* has a minimum of 0.6000, 25% percentile of 1.700, mean of  
395 2.691, 75% percentile of 4.125 and a maximum of 4.600. *L. enatum* has a minimum of -2.500, 25%  
396 percentile -0.4250, mean of 0.2125, 75% percentile of 1.200 and a maximum of 2.200. *L. malachurum* has  
397 a minimum of -2.100, 25% percentile of 0.7250, mean of 1.754, 75% percentile of 2.800 and a maximum  
398 of 4.500. The solitary, *S. curivcornis*, and communal *L. ferrerii*, were significantly different from the  
399 eusocial species, but not each other. Likewise, *L. enatum* and *L. malachurum* were not significantly  
400 different. *S. curvicornis* vs. *L. enatum* ; p-value of 0.0014, df of 7.932 and t of 6.226. *S. curvicornis*  
401 vs. *L. malachurum*; p-value of 0.0177, df 4.04 of and t of 5.895. *L. ferrerii* vs. *L. enatum*; p-value of  
402 0.0056, df of 17.09 and t of 3.982. *L. ferrerii* vs. *L. malachurum*; p-value of 0.0259, df of 33.42 and t of  
403 3.054.

404

405

406

407

408 **Tables and Figures:**

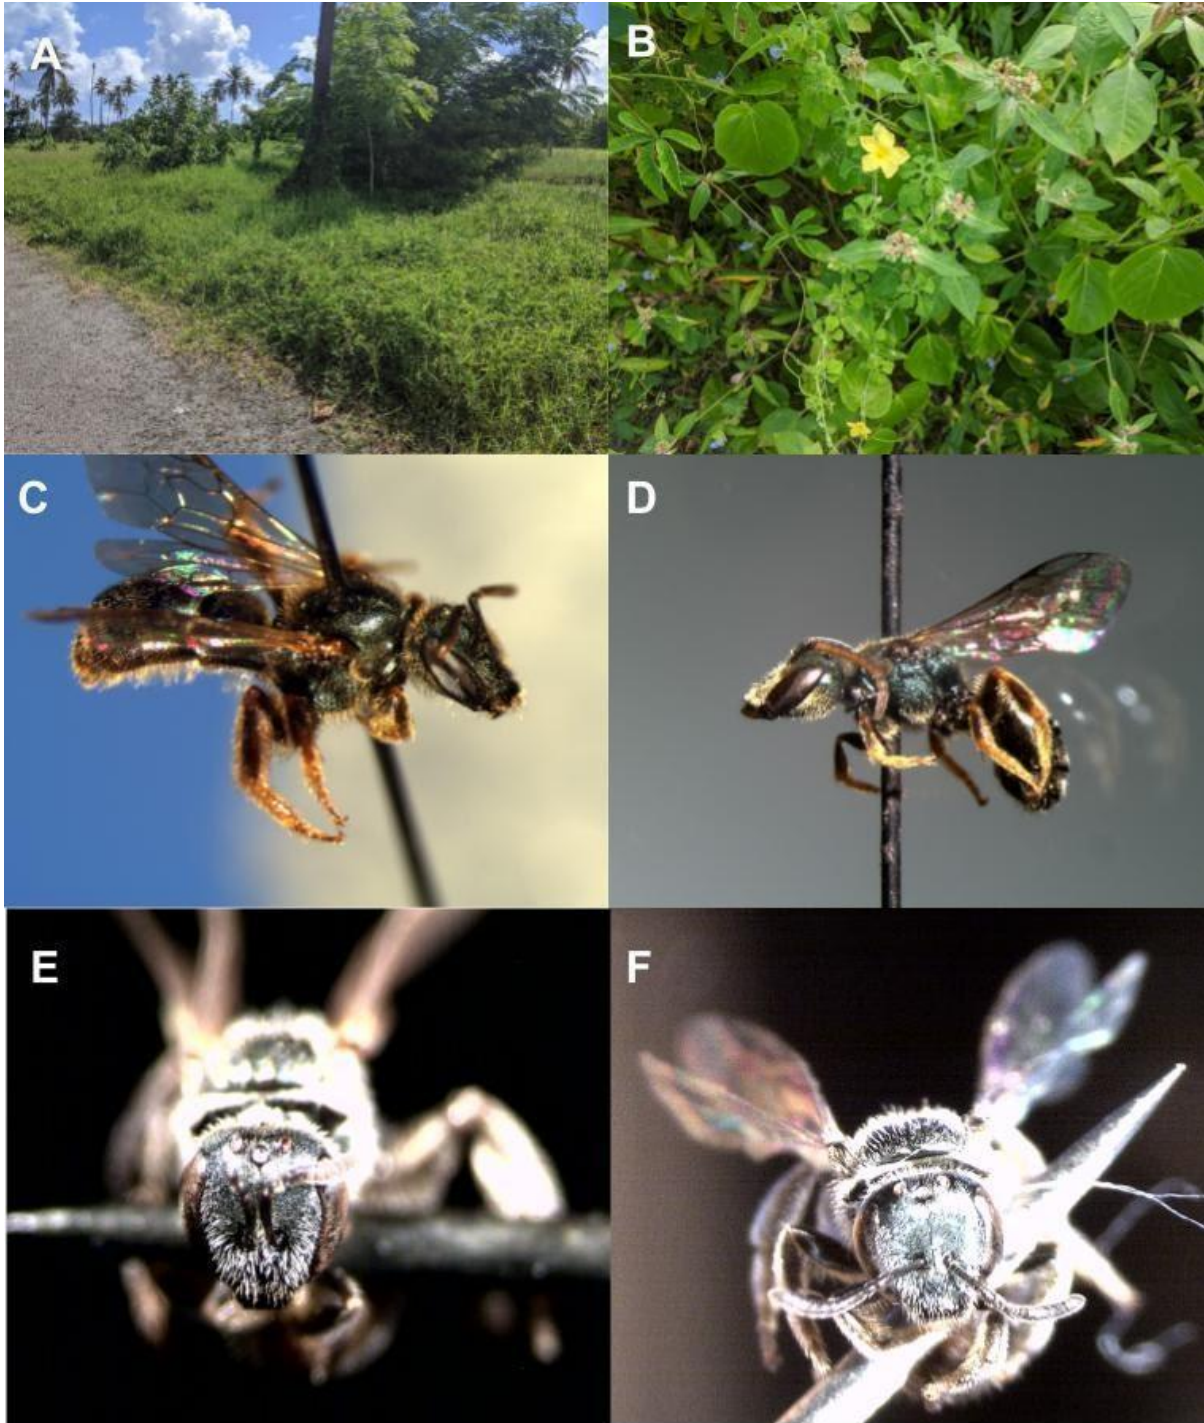

409



410 **Figure 1: Habitat (A-B) and Species Observed (C-F).**

411

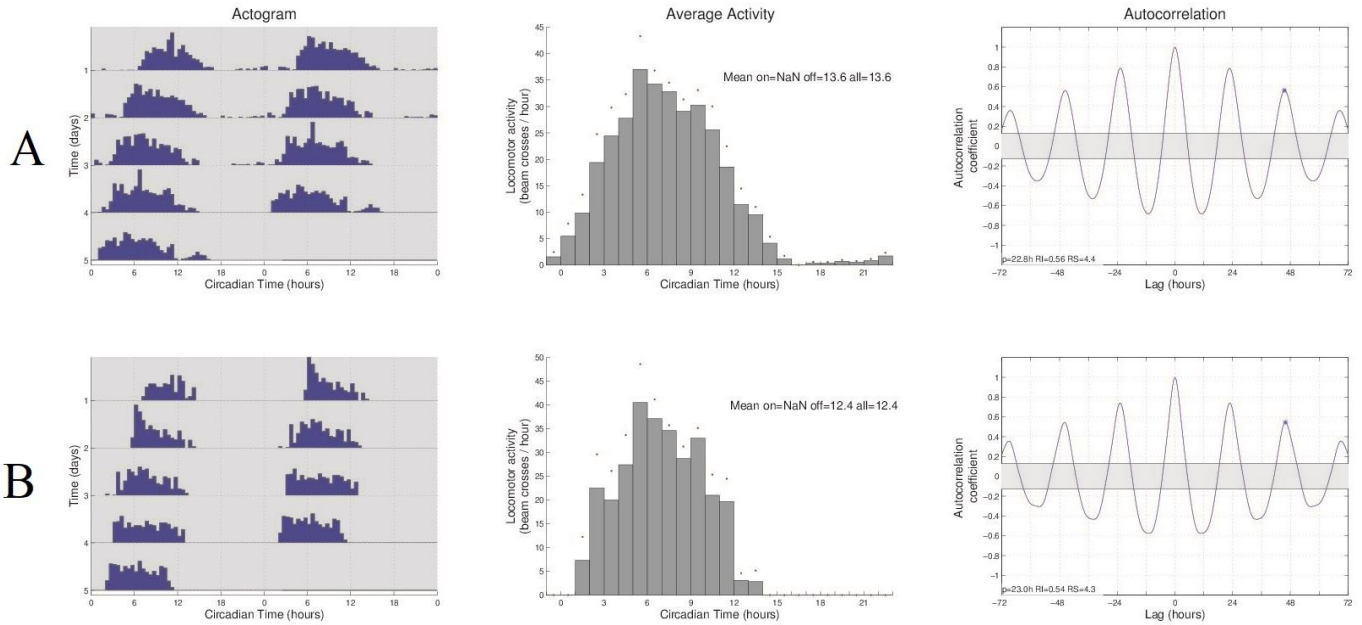

412

413 **Figure 2: Female *S. curvicornis* exhibit short period phenotype under constant darkness (<24 h endogenous**  
 414 **circadian rhythm)**

415

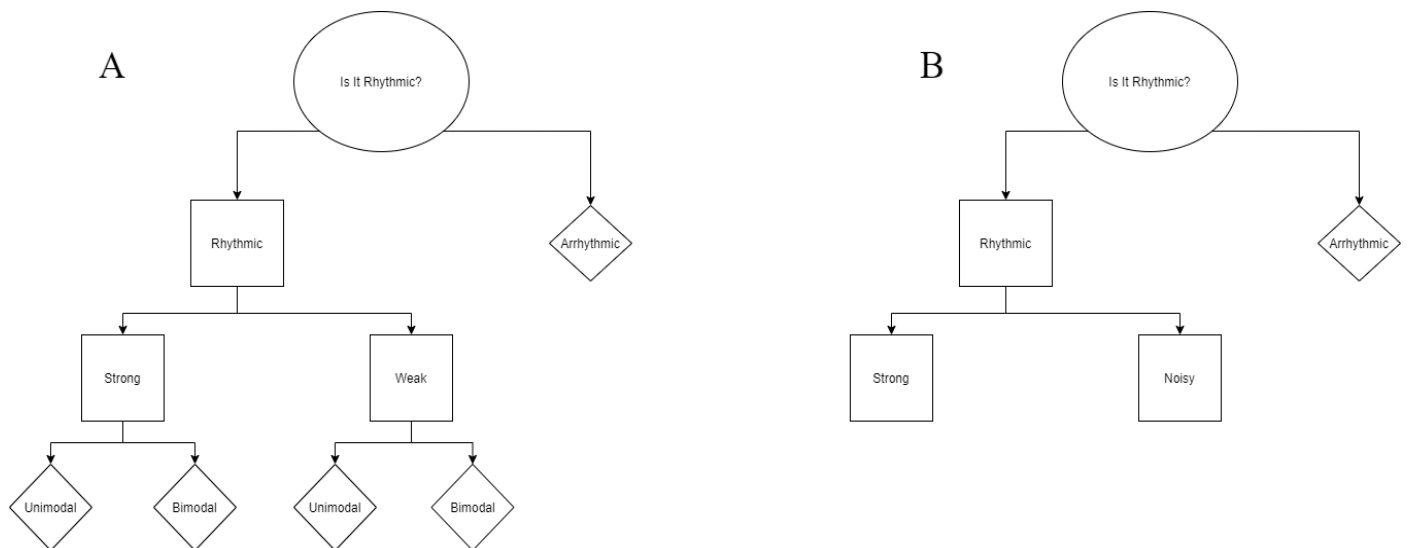

416

417 **Figure 3: A summary of the variations in the circadian rhythm as observed in:** A) *Lasioglossum malachurum*,  
 418 **B) *Lasioglossum enatum* and *Lasioglossum ferreirii***

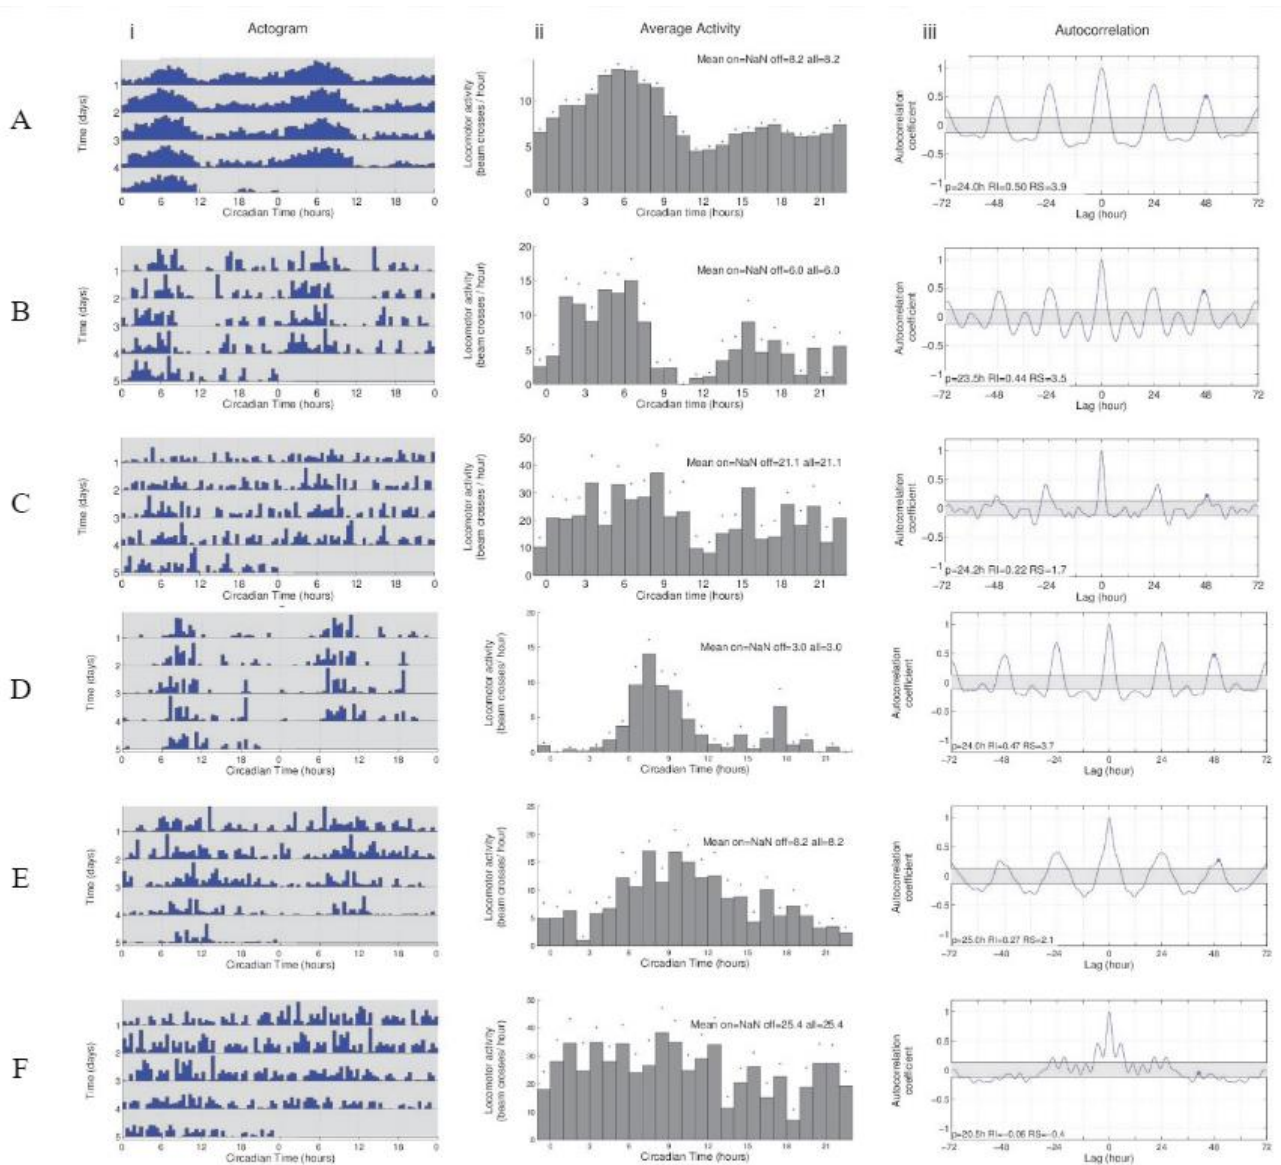

419

420 **Figure 4: *L. malachurum* exhibits a variety of circadian phenotypes under constant dark conditions.**

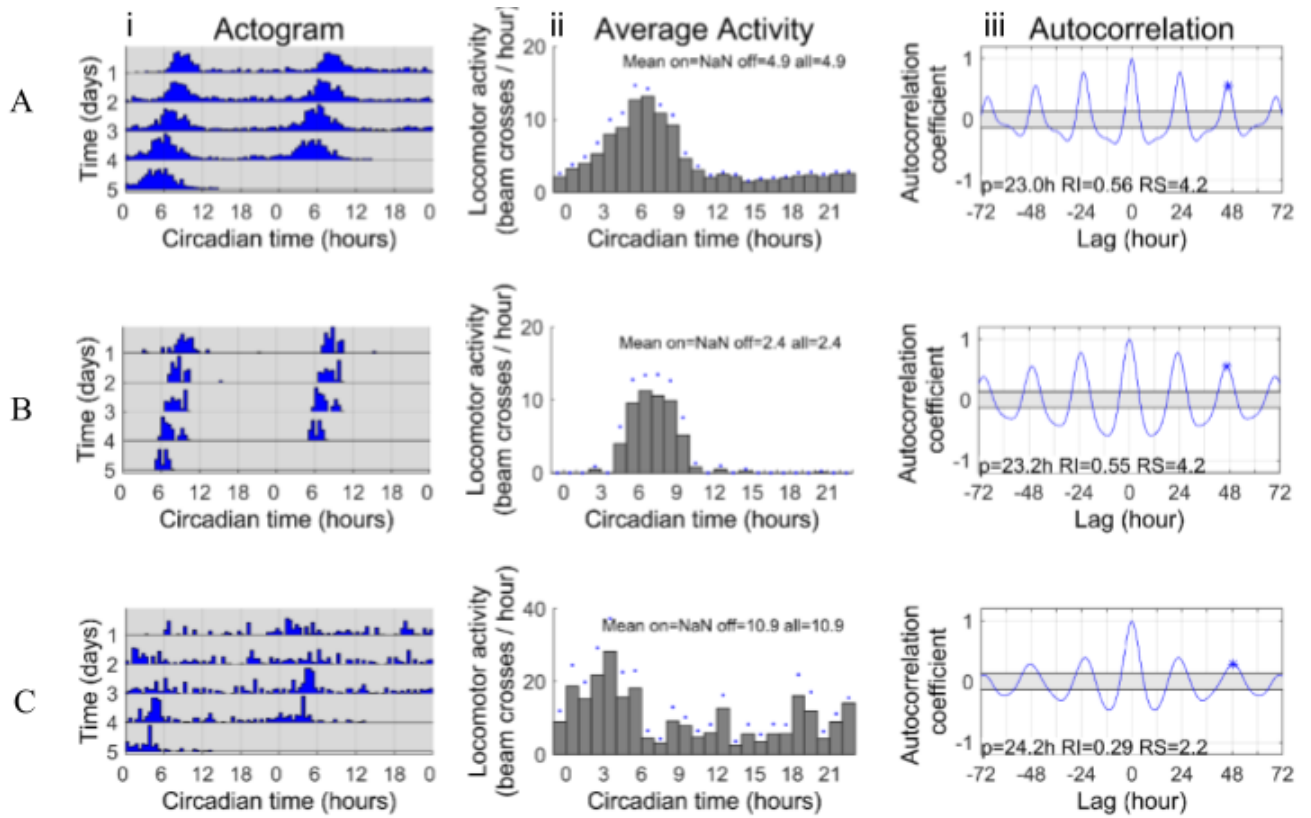

421

422 **Figure 5: Description of the circadian behaviors exhibited by *L. ferrerii* under constant dark conditions.**

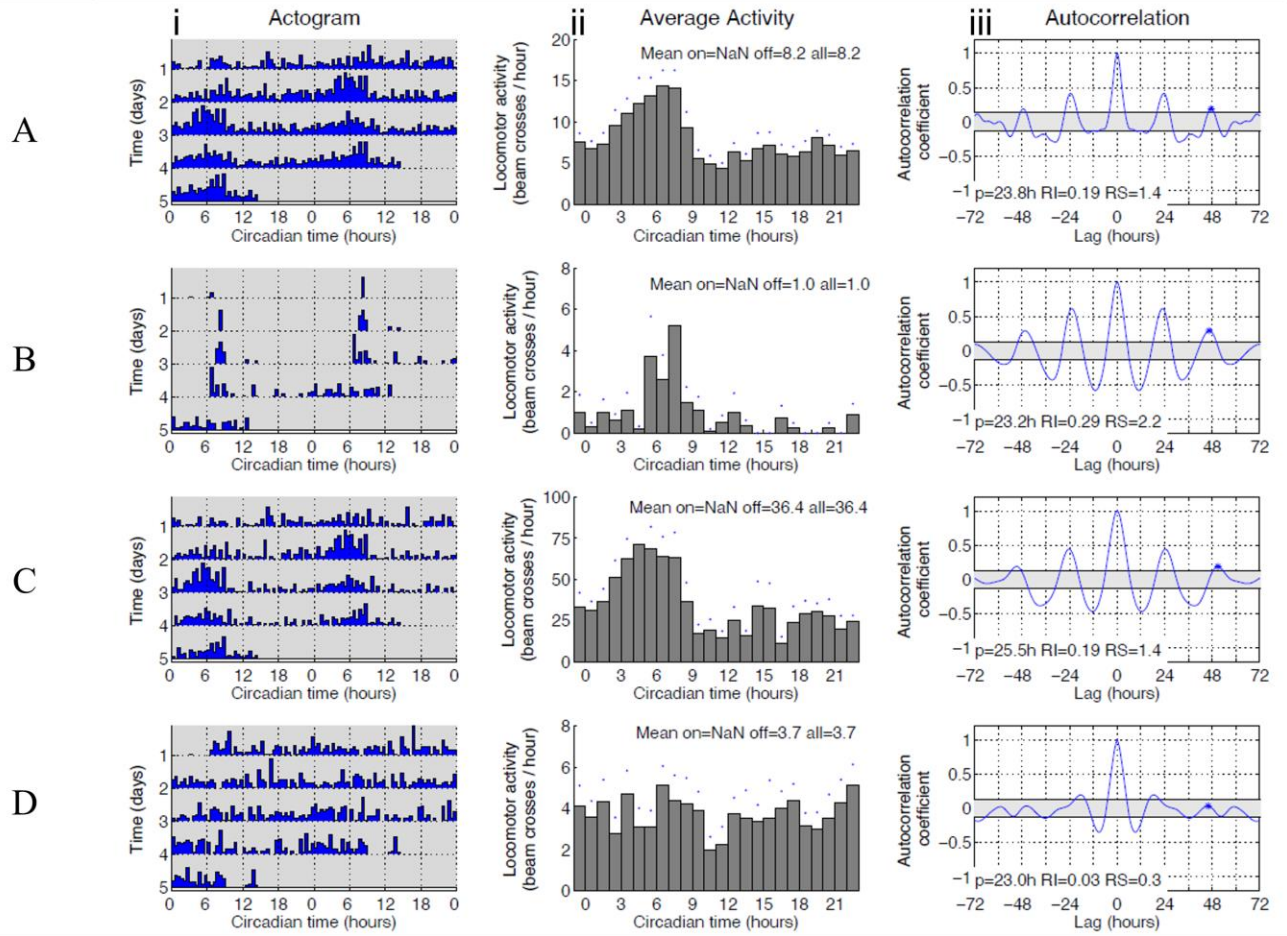

423

424 **Figure 6: Description of the circadian behaviors exhibited by *L. enatum* under constant dark conditions.**

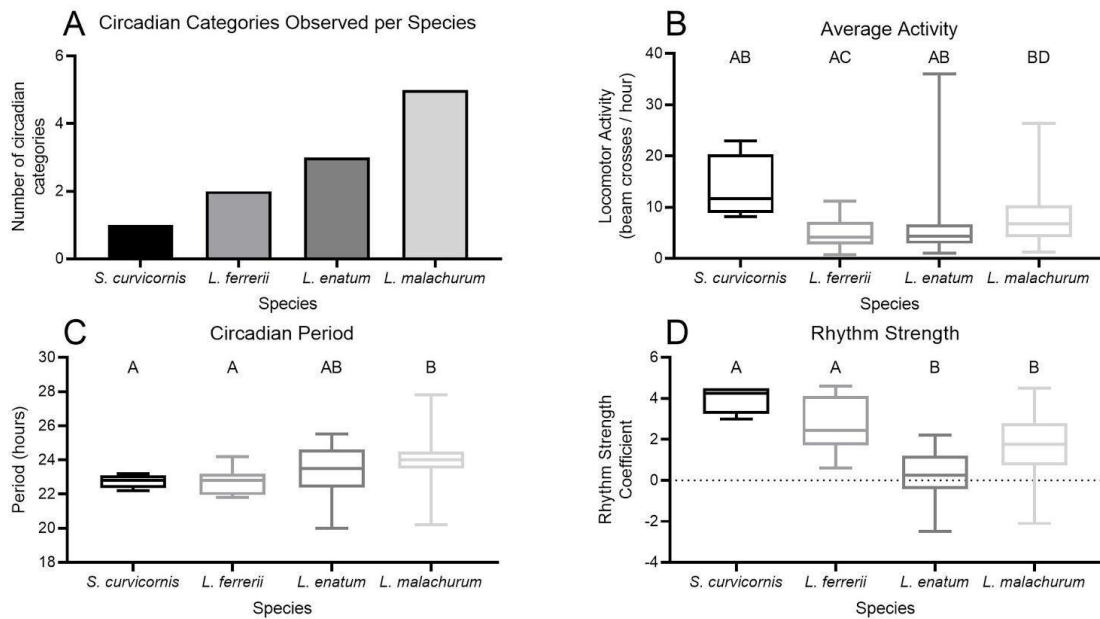

425

426 **Figure 7: Summary of descriptive and inferential statistics.**

427

428

429

430

431

432

433

434

435

436

437

438 **Literature Cited:**

- 439 **Beer, K., & Helfrich-Förster, C. (2020).** Post-embryonic Development of the Circadian Clock Seems to Correlate  
440 With Social Life Style in Bees. *Frontiers in Cell and Developmental Biology*, 8, 1325.  
441 <https://doi.org/10.3389/fcell.2020.581323>
- 442 **Bloch, G., & Grozinger, C. M. (2011).** Social molecular pathways and the evolution of bee societies. *Philosophical*  
443 *Transactions of the Royal Society B: Biological Sciences*, Vol. 366. <https://doi.org/10.1098/rstb.2010.0346>
- 444 **Bloch, G., Toma, D. P., & Robinson, G. E. (2001).** Behavioral rhythmicity, age, division of labor and period  
445 expression in the honey bee brain. *Journal of Biological Rhythms*, 16(5), 444–456.  
446 <https://doi.org/10.1177/074873001129002123>
- 447 **Danforth, B. N., Conway, L., & Ji, A. S. (2003).** Phylogeny of Eusocial *Lasioglossum* Reveals Multiple Losses of  
448 Eusociality within a Primitively Eusocial Clade of Bees (Hymenoptera: Halictidae). *Syst. Biol*, 52(1), shrimp.  
449 <https://doi.org/10.1080/10635150390132687>
- 450 **Delphia, C. M., & Gibbs, J. (2020).** New Island Records for *Lasioglossum* (Hymenoptera: Halictidae) from the  
451 Virgin Islands, West Indies. *Journal of the Kansas Entomological Society*, 92(2). [https://doi.org/10.2317/0022-8567-](https://doi.org/10.2317/0022-8567-92.2.479)  
452 [92.2.479](https://doi.org/10.2317/0022-8567-92.2.479)
- 453 **Dubowy, C., & Sehgal, A. (2017).** Circadian rhythms and sleep in *Drosophila melanogaster*. *Genetics*, 205(4),  
454 1373–1397. <https://doi.org/10.1534/genetics.115.185157>
- 455 **Eickwort G.C. (1988).** Distribution patterns and biology of West Indian sweat bees (Hymenoptera: Halictidae). In  
456 Liebherr J.K. (Ed.), *Zoogeography of Caribbean Insects* (pp. 232–253). Ithaca: Cornell University Press.
- 457 **Eickwort G.C., Eickwort J.M, Gordon J., Eickwort M.A. (1996)** Solitary behavior in a high-altitude population  
458 of the social sweat bee *Halictus rubicundus* (Hymenoptera: Halictidae), *Behav. Ecol. Sociobiol.* 38, 227–233.
- 459 **Field, J. (1996)** Patterns of provisioning and iteroparity in a solitary halictine bee, *Lasioglossum* (*Evyllaesus*)  
460 *fratellum* (Perez), with notes on *L. (E.) calceatum* (Scop.) and *L. (E.) villosulum* (K.). *Insect. Soc.* 43, 167–182
- 461 **Field, J., Paxton, R.J., Soro, A., Bridge, C., 2010.** Cryptic plasticity underlies a major evolutionary transition.  
462 *Curr. Biol.* 20, 2028–2031.

- 463 **Giannoni-Guzmán, M. A., Avalos, A., Perez, J. M., Loperena, E. J. O., Kayým, M., Medina, J. A., ... Agosto-**  
464 **Rivera, J. L. (2014).** Measuring individual locomotor rhythms in honey bees, paper wasps and other similar-sized  
465 insects. *Journal of Experimental Biology*, 217(8), 1307–1315. <https://doi.org/10.1242/jeb.096180>
- 466 **Giannoni-Guzmán, M. A., Aleman-Rios, J., Melendez Moreno, A. M., Diaz Hernandez, G., Perez, M.,**  
467 **Loubriel, D., ... Agosto-Rivera, J. L. (2020).** The Role of Temperature on the Development of Circadian Rhythms  
468 in Honey Bee Workers Authors. *BioRxiv*, 2020.08.17.254557. <https://doi.org/10.1101/2020.08.17.254557>
- 469 **Gibbs, J. (2018).** Bees of the genus *Lasioglossum* (Hymenoptera: Halictidae) from Greater Puerto Rico, West  
470 Indies. *European Journal of Taxonomy*, 0(400). Retrieved from  
471 <https://europeanjournaloftaxonomy.eu/index.php/ejt/article/view/528/1183>
- 472 **Gibbs, J., Brady, S. G., Kanda, K., & Danforth, B. N. (2012).** Phylogeny of halictine bees supports a shared  
473 origin of eusociality for *Halictus* and *Lasioglossum* (Apoidea: Anthophila: Halictidae). *Molecular Phylogenetics and*  
474 *Evolution*, 65(3). <https://doi.org/10.1016/j.ympev.2012.08.013>
- 475 **Gonzalez, V. H., Pascual, C., Burrows, S., Çakmak, I., & Barthell, J. F. (2014).** Pollen collecting behavior of  
476 *Systropha planidens* Giraud, 1861 (Hymenoptera: Halictidae) in Turkey. *Pan-Pacific Entomologist*, 90(4), 226–230.  
477 <https://doi.org/10.3956/2014-90.4.226>
- 478 **Grozdanic', S., and Z. Muc'alice. 1966.** Observations on the solitary bees *Systropha planidens* Gir., and *Systropha*  
479 *curvicornis* Scop. *Bulletin de Muse'um d'Historie Naturelle de Belgrade* 21b:133–138 [In Serbo-Croatian, with  
480 German summary].
- 481 **Helm, B., & Visser, M. E. (2010).** Heritable circadian period length in a wild bird population. *Proceedings of the*  
482 *Royal Society B: Biological Sciences*, 277(1698). <https://doi.org/10.1098/rspb.2010.0871>
- 483 **Jeanson, R., Clark, R., Holbrook, C., Bertram, S., Fewell, J., & Kukuk, P. (2008).** Division of labour and  
484 socially induced changes in response thresholds in associations of solitary halictine bees.  
485 <https://doi.org/10.1016/j.anbehav.2008.04.007i>

- 486 **Jud, C., Schmutz, I., Hampp, G., Oster, H., & Albrecht, U. (2005).** A guideline for analyzing circadian wheel-  
487 running behavior in rodents under different lighting conditions. *Biological Procedures Online*, 7(1), 101–116.  
488 <https://doi.org/10.1251/bpo109>
- 489 **Levine, J. D., Funes, P., Dowse, H. B., & Hall, J. C. (2002).** Signal analysis of behavioral and molecular cycles.  
490 *BMC Neuroscience*, 3. <https://doi.org/10.1186/1471-2202-3-1>
- 491 **Mistlberger, R. E., & Skene, D. J. (2004).** Social influences on mammalian circadian rhythms: Animal and human  
492 studies. *Biological Reviews of the Cambridge Philosophical Society*, Vol. 79, pp. 533–556.  
493 <https://doi.org/10.1017/S1464793103006353>
- 494 **Moore, D., Angel, J. E., Cheeseman, I. M., Fahrbach, S. E., & Robinson, G. E. (1998).** Timekeeping in the  
495 honey bee colony: Integration of circadian rhythms and division of labor. *Behavioral Ecology and Sociobiology*,  
496 43(3), 147–160. <https://doi.org/10.1007/s002650050476>
- 497 **Ortiz-Alvarado, Carlos A., Ambrose, Alexandria F., Cordero-Martinez, Claudia S., Silva-Echeandia,**  
498 **Sebastian A., Petanidou, Theodora, Tscheulin Thomas, Gonzalez, Victor H., Giray, Tugrul, Agosto-Rivera,**  
499 **Jose A., Barthell, John F. (in rev)** Daily foraging activity and circadian rhythms of a guild of three large carpenter  
500 bee species in Chasteberry (*Vitex agnus-castus* L.) on a Greek island (Lesvos).
- 501 **Patiny, S., & Michez, D. (2007).** New insights on the distribution and floral choices of *Systropha* Illiger, 1806 in  
502 Africa (Hymenoptera, Apoidea), with description of a new species from Sudan. *Zootaxa*, (1461), 59–68.  
503 <https://doi.org/10.11646/zootaxa.1461.1.6>
- 504 **Patiny, S., Michez, D., & Danforth, B. N. (2008).** Phylogenetic relationships and host-plant evolution within the  
505 basal clade of Halictidae (Hymenoptera, Apoidea). *Cladistics*, 24(3), 255–269. [https://doi.org/10.1111/j.1096-](https://doi.org/10.1111/j.1096-0031.2007.00182.x)  
506 [0031.2007.00182.x](https://doi.org/10.1111/j.1096-0031.2007.00182.x)
- 507 **Peters, R. S., Krogmann, L., Mayer, C., Donath, A., Gunkel, S., Meusemann, K., ... Niehuis, O. (2017).**  
508 Evolutionary History of the Hymenoptera. *Current Biology*, 27(7). <https://doi.org/10.1016/j.cub.2017.01.027>



- 509 **Radmacher, S., & Strohm, E. (2010).** Factors affecting offspring body size in the solitary bee *Osmia bicornis*  
510 (Hymenoptera, Megachilidae) Factors affecting offspring body size in the solitary bee *Osmia bicornis*  
511 (Hymenoptera, Megachilidae)\*. *Apidologie*, 41, 169–177. <https://doi.org/10.1051/apido/2009064i>
- 512 **Richards, M. H. (2000).** Evidence for geographic variation in colony social organization in an obligately social  
513 sweat bee, *Lasioglossum malachurum* Kirby (Hymenoptera; Halictidae). *Canadian Journal of Zoology*, 78(7).  
514 <https://doi.org/10.1139/z00-064>
- 515 **Richards, M. H., von Wettberg, E. J. & Rutgers, A. C. (2003)** A novel social polymorphism in a primitively  
516 eusocial bee. *Proc. Natl Acad. Sci. USA* 100, 7175–7180. doi:10.1073/pnas.1030738100
- 517 **Roenneberg, T., Wirz-Justice, A., & Mellow, M. (2003).** Life between Clocks: Daily Temporal Patterns of  
518 Human Chronotypes. *Journal of Biological Rhythms*, 18(1). <https://doi.org/10.1177/0748730402239679>
- 519 **Schwarz, M. P., Richards, M. H., & Danforth, B. N. (2006).** Changing Paradigms in Insect Social Evolution:  
520 Insights from Halictine and Allodapine Bees. <https://doi.org/10.1146/annurev.ento.51.110104.150950>
- 521 **Steitz, I., Kingwell, C., Paxton, R. J., & Ayasse, M. (2018).** Evolution of Caste-Specific Chemical Profiles in  
522 Halictid Bees. *Journal of Chemical Ecology*, 44(9), 827–837. <https://doi.org/10.1007/s10886-018-0991-8>
- 523 **Toth, A. L., & Rehan, S. M. (2017).** Molecular Evolution of Insect Sociality: An Eco-Evo-Devo Perspective.  
524 *Annual Review of Entomology*, 62(1). <https://doi.org/10.1146/annurev-ento-031616-035601>
- 525 **VanderPlas, J. T. (2017).** Understanding the lomb-scargle periodogram. *ArXiv*, Vol. 236, p. 16.  
526 <https://doi.org/10.3847/1538-4365/aab766>
- 527 **Westrich, P. (1989).** *Die Wildbienen Baden-Wu`rttembergs*. Ulmer Verlag, Stuttgart, Germany. 972 pp
- 528 **Wyman, L. M., & Richards, M. H. (2003).** Colony social organization of *Lasioglossum malachurum* Kirby  
529 (Hymenoptera, Halictidae) in southern Greece. *Insectes Sociaux*, 50(3). <https://doi.org/10.1007/s00040-003-0647-7>
